# Supplementary material
Source: PubMed Central journal article supplement (PMC7004233)
Supplement: NIHMS1067355-supplement-supplment.pdf [file NIHMS1067355-supplement-supplment.pdf]

## Supporting Information

### Orthogonal Method for Double Bond Placement via Ozone-Induced Dissociation Mass Spectrometry (OzID-MS)

Sonja L. Knowles, Ngoc Vu, Daniel A. Todd, Huzefa A. Raja, Antonis Rokas, Qibin Zhang, and Nicholas H. Oberlies

**Table S1.** NMR table of ent-sartorypyrone E (**1**)

**Table S2.** Table of accurate masses for the OzID products of compound **1**

**Table S3.** Table of accurate masses for the OzID products of compound **1** in an extract

**Table S4.** Table of accurate masses for the OzID products of compound **1** *in situ*

**Table S5.** Table of accurate masses for the OzID products of compound **2**

**Table S6.** Table of accurate masses for the OzID products of compound **3**

**Table S7.** Table of accurate masses for the OzID products of compound **4**

**Table S8.** Table of accurate masses for the OzID products of compound **5**

**Figure S1.** UPLC-PDA detector chromatogram of ent-sartorypyrone E (**1**)

**Figure S2.** <sup>1</sup>H NMR spectrum (700 MHz, Top) and <sup>13</sup>C NMR spectrum (175 MHz, Bottom) both in CDCl<sub>3</sub>, of ent-sartorypyrone E (**1**)

**Figure S3.** HSQC spectrum of ent-sartorypyrone E (**1**), CDCl<sub>3</sub>, 700 MHz

**Figure S4.** HMBC spectrum of ent-sartorypyrone E (**1**), CDCl<sub>3</sub>, 700 MHz

**Figure S5.** <sup>1</sup>H COSY spectrum of ent-sartorypyrone E (**1**), CDCl<sub>3</sub>, 700 MHz

**Figure S6.** UPLC-PDA detector chromatogram of an extract of *A. fischeri* grown on solid oatmeal media

**Figure S7.** <sup>1</sup>H NMR spectrum (400 MHz) in CDCl<sub>3</sub>, of sorbicillin (**3**)

**Figure S8.** <sup>1</sup>H NMR spectrum (500 MHz) in MeOD, of trichodermic acid A (**4**)

**Figure S9.** <sup>1</sup>H NMR spectrum (500 MHz) in (CD<sub>3</sub>)<sub>2</sub>CO, of AA03390 (**5**)

**Figure S10.** Schematic of the Waters Synapt G2 HDMS modified to allow ozone in the trap and transfer cells to perform OzID-MS. Adapted from Vu et al.<sup>1</sup>

### Structure Elucidation by Traditional NMR and Mass Spectrometry Techniques. For Compound 1

Ent-sartorypyrone E (**1**) was obtained as a white solid with a molecular formula of  $C_{26}H_{40}O_5$  as determined via HRESIMS along with  $^1H$ ,  $^{13}C$ , and edited-HSQC NMR data (Table 1), demonstrating an index of hydrogen deficiency of 7. Inspection of the MS and NMR data suggested **1** as an analogue of sartorypyrone A (**2**).<sup>2</sup> For example, **1** showed a trisubstituted unsaturated  $\delta$ -lactone moiety, as noted by two conjugated double bonds ( $\delta_C$  100.6, 165.5, 100.5, and 160.3 for C-3, C-4, C-5, and C-6 respectively) containing one olefinic proton ( $\delta_H$  5.75 for H-5), both of which were conjugated with an ester ( $\delta_C$  165.6 for C-2). Additional similarities included NMR signals characteristic of two sequential isoprene units, which were connected to the  $\alpha$ -position ( $\delta_C$  100.6 for C-3) of the  $\delta$ -lactone moiety. Key differences between compound **2**<sup>2</sup> and **1** were in the terminal part of the terpenoid side chain. Specifically, compound **1** lacked the terminal cyclohexane moiety along with the acetyl group seen in **2**, which were replaced by a dihydroxy unsaturated isoprene unit, as indicated by NMR data characteristic of two methyls ( $\delta_H/\delta_C$  1.2/26.4; 1.2/23.2 for  $CH_3$ -22 and  $CH_3$ -23, respectively), two methylenes ( $\delta_H/\delta_C$  2.22/2.06/26.8; 1.40/1.59/29.5 for  $CH_2$ -18 and  $CH_2$ -19, respectively), one oxymethine ( $\delta_H/\delta_C$  3.36/78.3, for CH-20), and a quaternary oxygenated carbon ( $\delta_C$  73.1 for C-21). These data, along with further analysis of the 2D-NMR data, including COSY and HMBC experiments (Figure 2 and discussed in the manuscript under section "Structure Elucidation by Traditional NMR and Mass Spectrometry Techniques"), yielded the structure of compound **1**.

**Table S1.** NMR table of ent-sartorypyrone E (1)

| Position | $\delta_{\text{H}}$ | $\delta_{\text{C}}$ | Mult (J in Hz)              |
|----------|---------------------|---------------------|-----------------------------|
| 2        |                     | 165.6               |                             |
| 3        |                     | 100.6               |                             |
| 4        |                     | 165.5               |                             |
| 5        | 5.75                | 100.5               | d (1.1)                     |
| 6        |                     | 160.3               |                             |
| 7        | 3.23                | 23.0                | d (7.4)                     |
| 8        | 5.31                | 120.6               | m                           |
| 9        |                     | 140.9               |                             |
| 10       | 2.10                | 39.5                | m                           |
| 11       | 2.12                | 25.8                | m                           |
| 12       | 5.04                | 123.6               | m                           |
| 13       |                     | 135.6               |                             |
| 14       | 1.99                | 39.4                | m                           |
| 15       | 2.08                | 26.1                | m                           |
| 16       | 5.15                | 125.1               | m                           |
| 17       |                     | 134.7               |                             |
| 18       | 2.22                | 26.8                | m                           |
|          | 2.06                |                     | m                           |
| 19       | 1.40                | 29.5                | dddd (14.0, 10.6, 8.4, 5.7) |
|          | 1.59                |                     | m                           |
| 20       | 3.36                | 78.3                | dd (10.6, 1.9)              |
| 21       |                     | 73.1                |                             |
| 22       | 1.15                | 23.2                | s                           |
| 23       | 1.20                | 26.4                | s                           |
| 24       | 1.60                | 15.8                | s                           |
| 25       | 1.58                | 16.0                | s                           |
| 26       | 1.77                | 16.3                | s                           |
| 27       | 2.18                | 19.7                | s                           |

**Table S2.** Table of accurate masses for the OzID products of compound 1

| OzID-MS Products | Molecular Formula     | Measured Value | Calculated Value | Accuracy (in ppm) |
|------------------|-----------------------|----------------|------------------|-------------------|
| Parent Mass      | $C_{26}H_{40}NaO_5^+$ | 455.2772       | 455.2773         | 0.2               |
| B                | $C_{18}H_{32}NaO_3^+$ | 319.2248       | 319.2249         | 0.3               |
| a                | $C_8H_8NaO_5^+$       | 207.0287       | 207.0269         | 8.7               |
| b                | $C_{18}H_{32}NaO_4^+$ | 335.2202       | 335.2198         | 1.2               |
| A                | $C_8H_8NaO_4^+$       | 191.0332       | 191.0320         | 6.3               |
| B                | $C_{13}H_{24}NaO_3^+$ | 251.1634       | 251.1623         | 4.4               |
| a                | $C_{13}H_{16}NaO_5^+$ | 275.0902       | 275.0895         | 2.5               |
| b                | $C_{13}H_{24}NaO_4^+$ | 267.1579       | 267.1573         | 2.2               |
| A                | $C_{13}H_{16}NaO_4^+$ | 259.0954       | 259.0946         | 3.1               |
| B                | $C_8H_{16}NaO_3^+$    | 183.0992       | 183.0997         | 2.7               |
| a                | $C_{18}H_{24}NaO_5^+$ | 343.1526       | 343.1522         | 1.2               |
| b                | $C_8H_{16}NaO_4^+$    | 199.0954       | 199.0946         | 4.0               |
| A                | $C_{18}H_{24}NaO_4^+$ | 327.1578       | 327.1573         | 1.5               |

**Table S3.** Table of accurate masses for the OzID products of compound **1** in an extract

| OzID-MS Products | Molecular Formula     | Measured Value | Calculated Value | Accuracy (in ppm) |
|------------------|-----------------------|----------------|------------------|-------------------|
| Parent Mass      | $C_{26}H_{40}NaO_5^+$ | 455.2780       | 455.2773         | 1.5               |
| B                | $C_{18}H_{32}NaO_3^+$ | 319.2239       | 319.2249         | 3.1               |
| a                | $C_8H_8NaO_5^+$       | -              | 207.0269         | -                 |
| b                | $C_{18}H_{32}NaO_4^+$ | 335.2192       | 335.2198         | 1.8               |
| A                | $C_8H_8NaO_4^+$       | 191.0329       | 191.0320         | 4.7               |
| B                | $C_{13}H_{24}NaO_3^+$ | 251.1616       | 251.1623         | 2.8               |
| a                | $C_{13}H_{16}NaO_5^+$ | 275.0886       | 275.0895         | 3.3               |
| b                | $C_{13}H_{24}NaO_4^+$ | 267.1573       | 267.1573         | 0.0               |
| A                | $C_{13}H_{16}NaO_4^+$ | 259.0950       | 259.0946         | 1.5               |
| B                | $C_8H_{16}NaO_3^+$    | 183.0983       | 183.0997         | 7.6               |
| a                | $C_{18}H_{24}NaO_5^+$ | 343.1520       | 343.1522         | 0.6               |
| b                | $C_8H_{16}NaO_4^+$    | 199.0937       | 199.0946         | 4.5               |
| A                | $C_{18}H_{24}NaO_4^+$ | 327.1567       | 327.1573         | 1.8               |

**Table S4.** Table of accurate masses for the OzID products of compound **1** *in situ*

| OzID-MS Products | Molecular Formula     | Measured Value | Calculated Value | Accuracy (in ppm) |
|------------------|-----------------------|----------------|------------------|-------------------|
| Parent Mass      | $C_{26}H_{40}NaO_5^+$ | 455.2783       | 455.2773         | 2.2               |
| B                | $C_{18}H_{32}NaO_3^+$ | 319.2241       | 319.2249         | 2.5               |
| a                | $C_8H_8NaO_5^+$       | -              | 207.0269         | -                 |
| b                | $C_{18}H_{32}NaO_4^+$ | 335.2200       | 335.2198         | 0.6               |
| A                | $C_8H_8NaO_4^+$       | 191.0332       | 191.0320         | 6.3               |
| B                | $C_{13}H_{24}NaO_3^+$ | 251.1619       | 251.1623         | 1.6               |
| a                | $C_{13}H_{16}NaO_5^+$ | 275.0885       | 275.0895         | 3.6               |
| b                | $C_{13}H_{24}NaO_4^+$ | 267.1567       | 267.1573         | 2.2               |
| A                | $C_{13}H_{16}NaO_4^+$ | 259.0952       | 259.0946         | 2.3               |
| B                | $C_8H_{16}NaO_3^+$    | 183.1024       | 183.0997         | 14.7*             |
| a                | $C_{18}H_{24}NaO_5^+$ | 343.1515       | 343.1522         | 2.0               |
| b                | $C_8H_{16}NaO_4^+$    | 199.0919       | 199.0946         | 13.6*             |
| A                | $C_{18}H_{24}NaO_4^+$ | 327.1583       | 327.1573         | 3.1               |

\* The measured value was close to the noise level which caused the ppm shift to be out of the 10 ppm range.

**Table S5.** Table of accurate masses for the OzID products of compound **2**

| OzID-MS Products | Molecular Formula     | Measured Value | Calculated Value | Accuracy (in ppm) |
|------------------|-----------------------|----------------|------------------|-------------------|
| Parent Mass      | $C_{28}H_{40}O_5Na^+$ | 479.2784       | 479.2773         | 2.3               |
| B                | $C_{20}H_{32}O_3Na^+$ | 343.1948       | 343.2249         | 87.7              |
| a                | $C_8H_8O_5Na^+$       | 207.0283       | 207.0269         | 6.8               |
| b                | $C_{20}H_{32}O_4Na^+$ | 359.2246       | 359.2198         | 13.3              |
| A                | $C_8H_8O_4Na^+$       | 191.0335       | 191.0320         | 7.9               |
| a                | $C_{13}H_{16}O_5Na^+$ | 275.0936       | 275.0895         | 14.9              |
| A                | $C_{13}H_{16}O_4Na^+$ | 259.0984       | 259.0949         | 13.5              |

**Table S6.** Table of accurate masses for the OzID products of compound **3**

| OzID-MS Products | Molecular Formula     | Measured Value | Calculated Value | Accuracy (in ppm) |
|------------------|-----------------------|----------------|------------------|-------------------|
| Parent Mass      | $C_{14}H_{16}O_3Na^+$ | 255.1003       | 255.0997         | 2.4               |
| A                | $C_{10}H_{10}O_4Na^+$ | 217.0475       | 217.0477         | 0.9               |
| A                | $C_{12}H_{12}O_4Na^+$ | 243.0625       | 243.0634         | 3.7               |
| ●                | $C_{14}H_{16}O_4Na^+$ | 271.0966       | 271.0946         | 7.4               |



**Table S7.** Table of accurate masses for the OzID products of compound **4**

| OzID-MS Products | Molecular Formula     | Measured Value | Calculated Value | Accuracy (in ppm) |
|------------------|-----------------------|----------------|------------------|-------------------|
| Parent Mass      | $C_{19}H_{28}O_4Na^+$ | 343.1891       | 343.1886         | 1.5               |
| A                | $C_{14}H_{22}O_3Na^+$ | 261.1485       | 261.1467         | 6.9               |
| A                | $C_{16}H_{24}O_3Na^+$ | 287.1632       | 287.1624         | 2.8               |
| ●                | $C_{19}H_{28}O_5Na^+$ | 359.1840       | 359.1835         | 1.4               |
| a                | $C_{16}H_{24}O_4Na^+$ | 303.1581       | 303.1567         | 4.6               |

**Table S8.** Table of accurate masses for the OzID products of compound **5**

| OzID-MS Products | Molecular Formula     | Measured Value | Calculated Value | Accuracy (in ppm) |
|------------------|-----------------------|----------------|------------------|-------------------|
| Parent Mass      | $C_{26}H_{38}O_5Na^+$ | 453.2609       | 453.2617         | 1.8               |
| <b>a</b>         | $C_{20}H_{28}O_6Na^+$ | 387.1808       | 387.1784         | 6.2               |
| <b>A</b>         | $C_{20}H_{28}O_5Na^+$ | 371.1844       | 371.1835         | 2.4               |
| <b>a</b>         | $C_{22}H_{30}O_6Na^+$ | 413.2004       | 413.1940         | 15.5              |
| <b>A</b>         | $C_{22}H_{30}O_5Na^+$ | 397.1985       | 397.1991         | 1.5               |
| <b>●</b>         | $C_{26}H_{38}O_6Na^+$ | 469.2548       | 469.2566         | 3.8               |

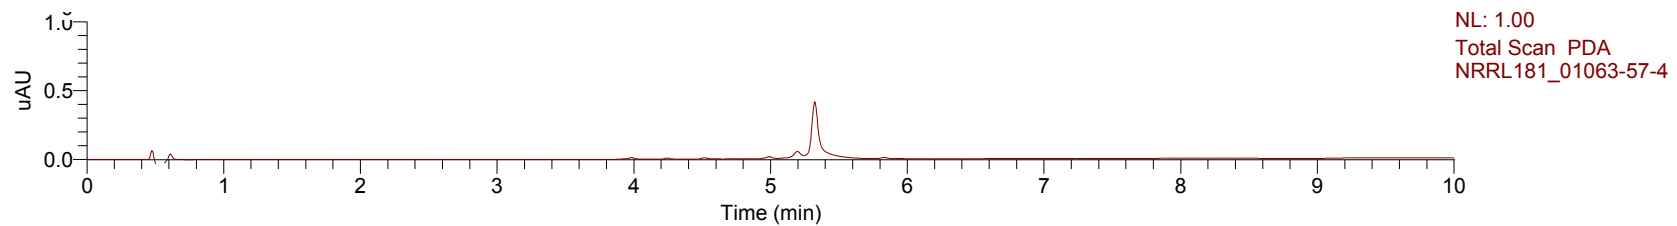

**Figure S1.** UPLC-PDA detector chromatogram of ent-sartorypyrone E (1)

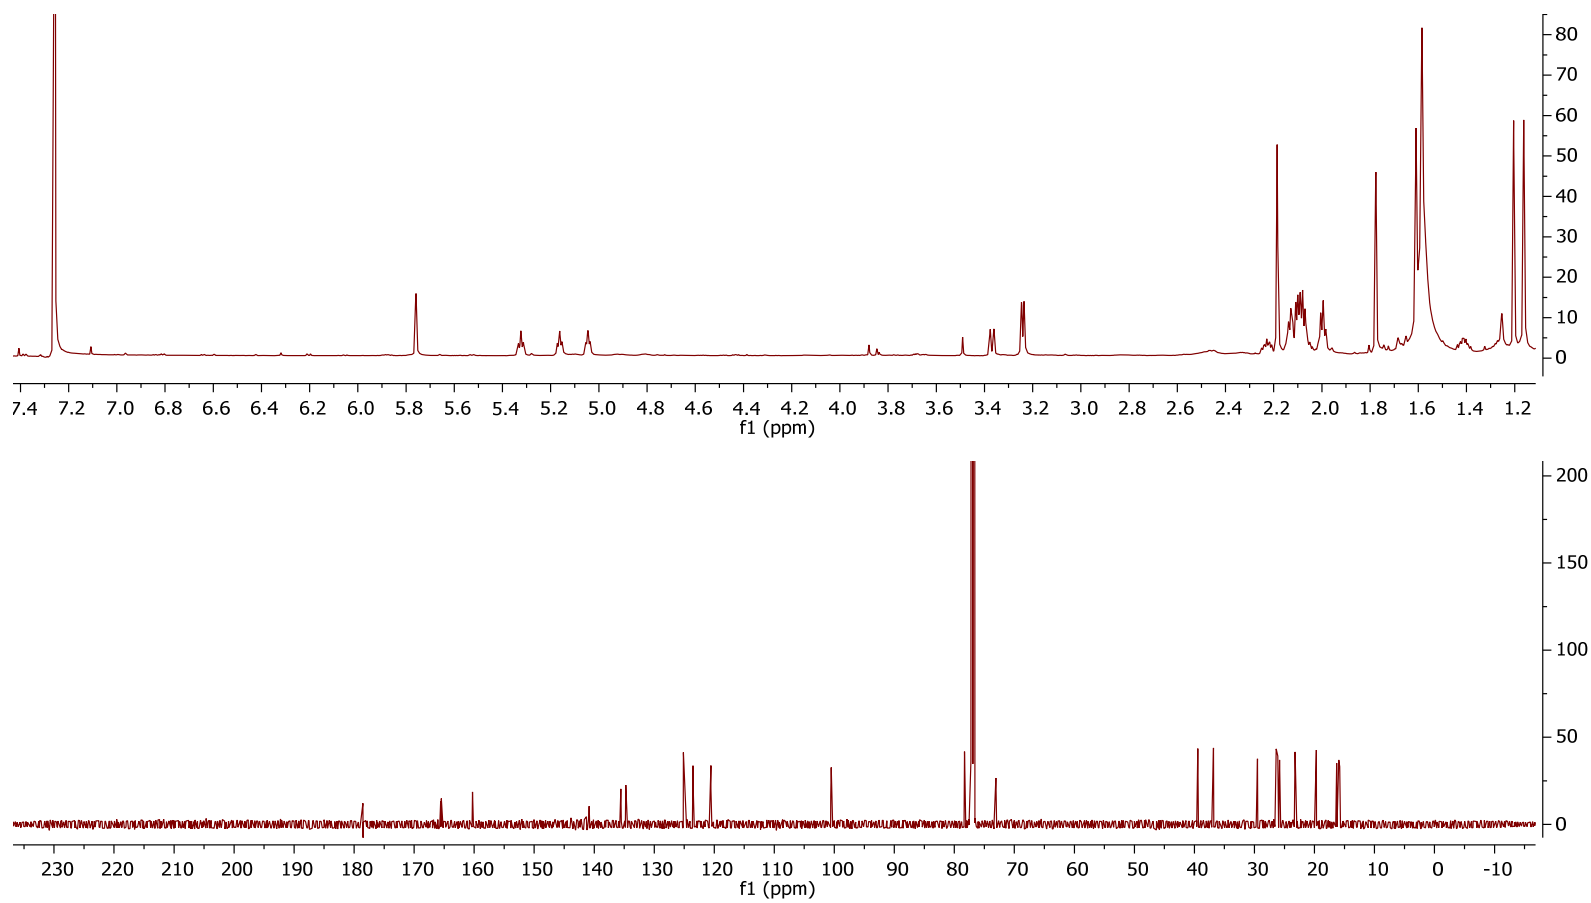

**Figure S2.** <sup>1</sup>H NMR spectrum (700 MHz, Top) and <sup>13</sup>C NMR spectrum (175 MHz, Bottom) both in CDCl<sub>3</sub>, of ent-sartorypyrone E (**1**)

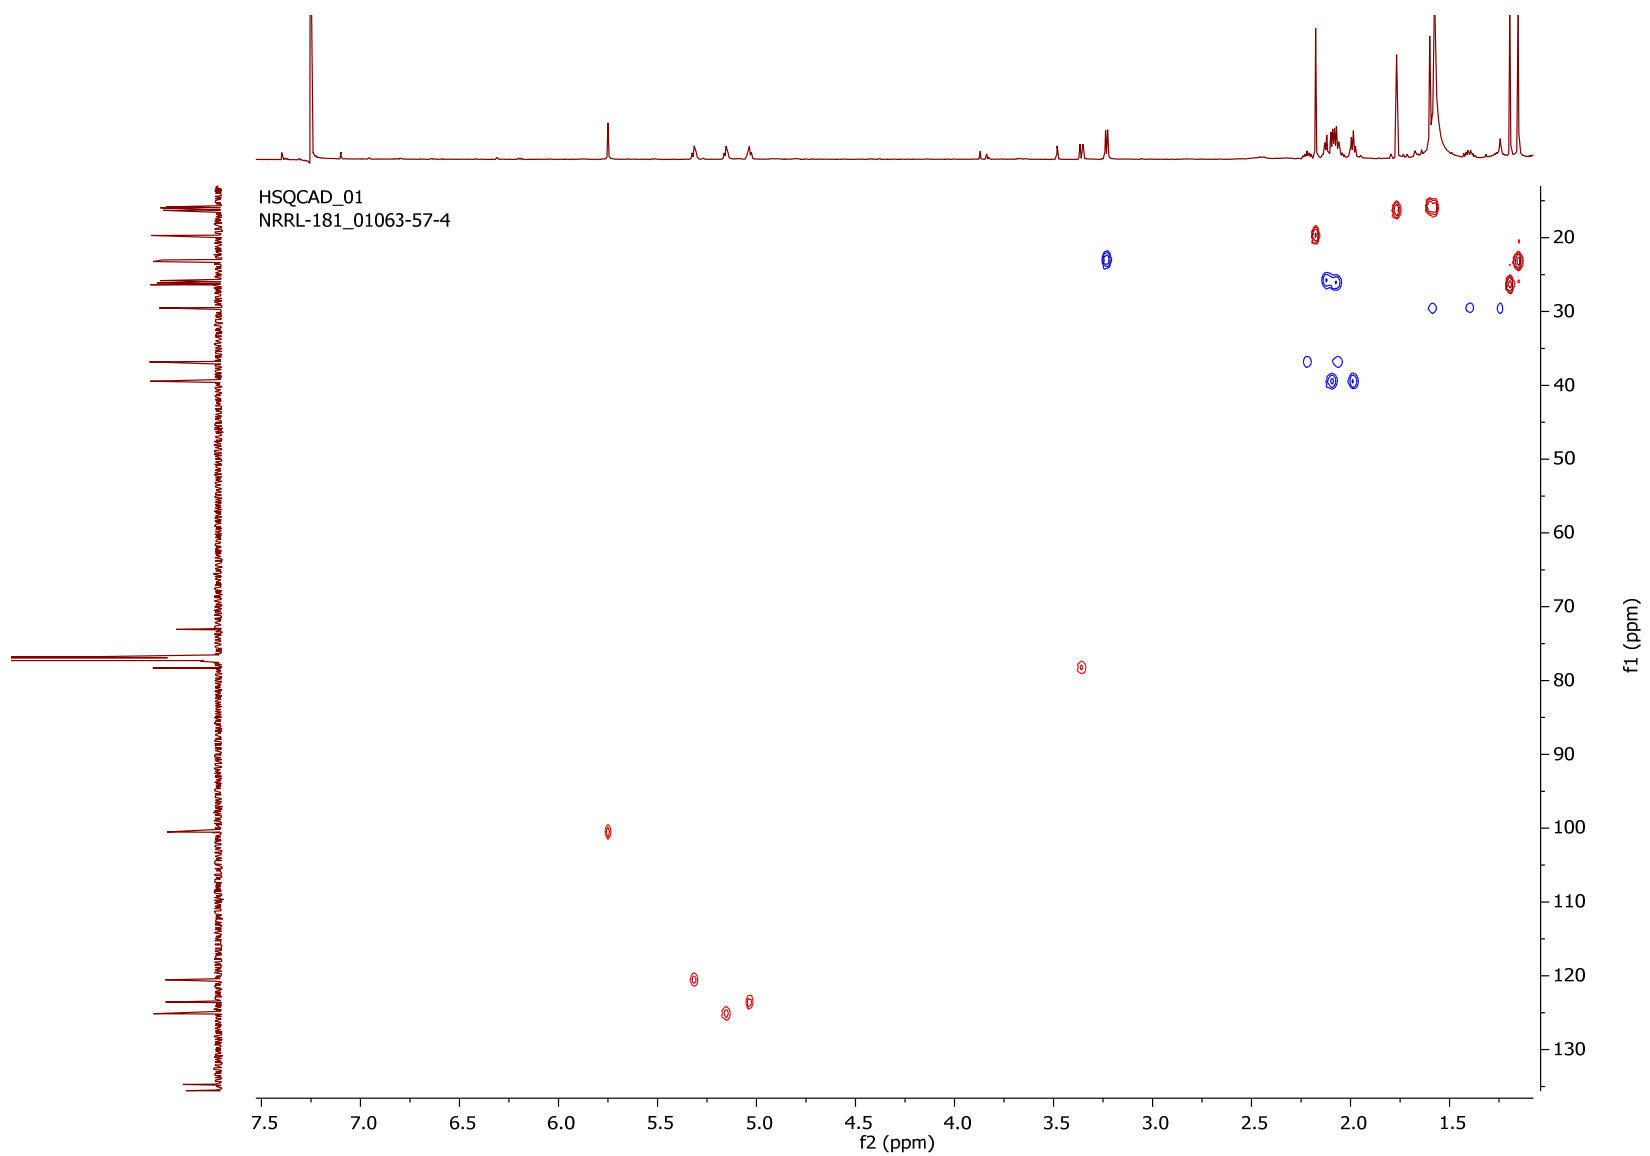

**Figure S3.** HSQC spectrum of ent-sartorypyrone E (**1**), CDCl<sub>3</sub>, 700 MHz

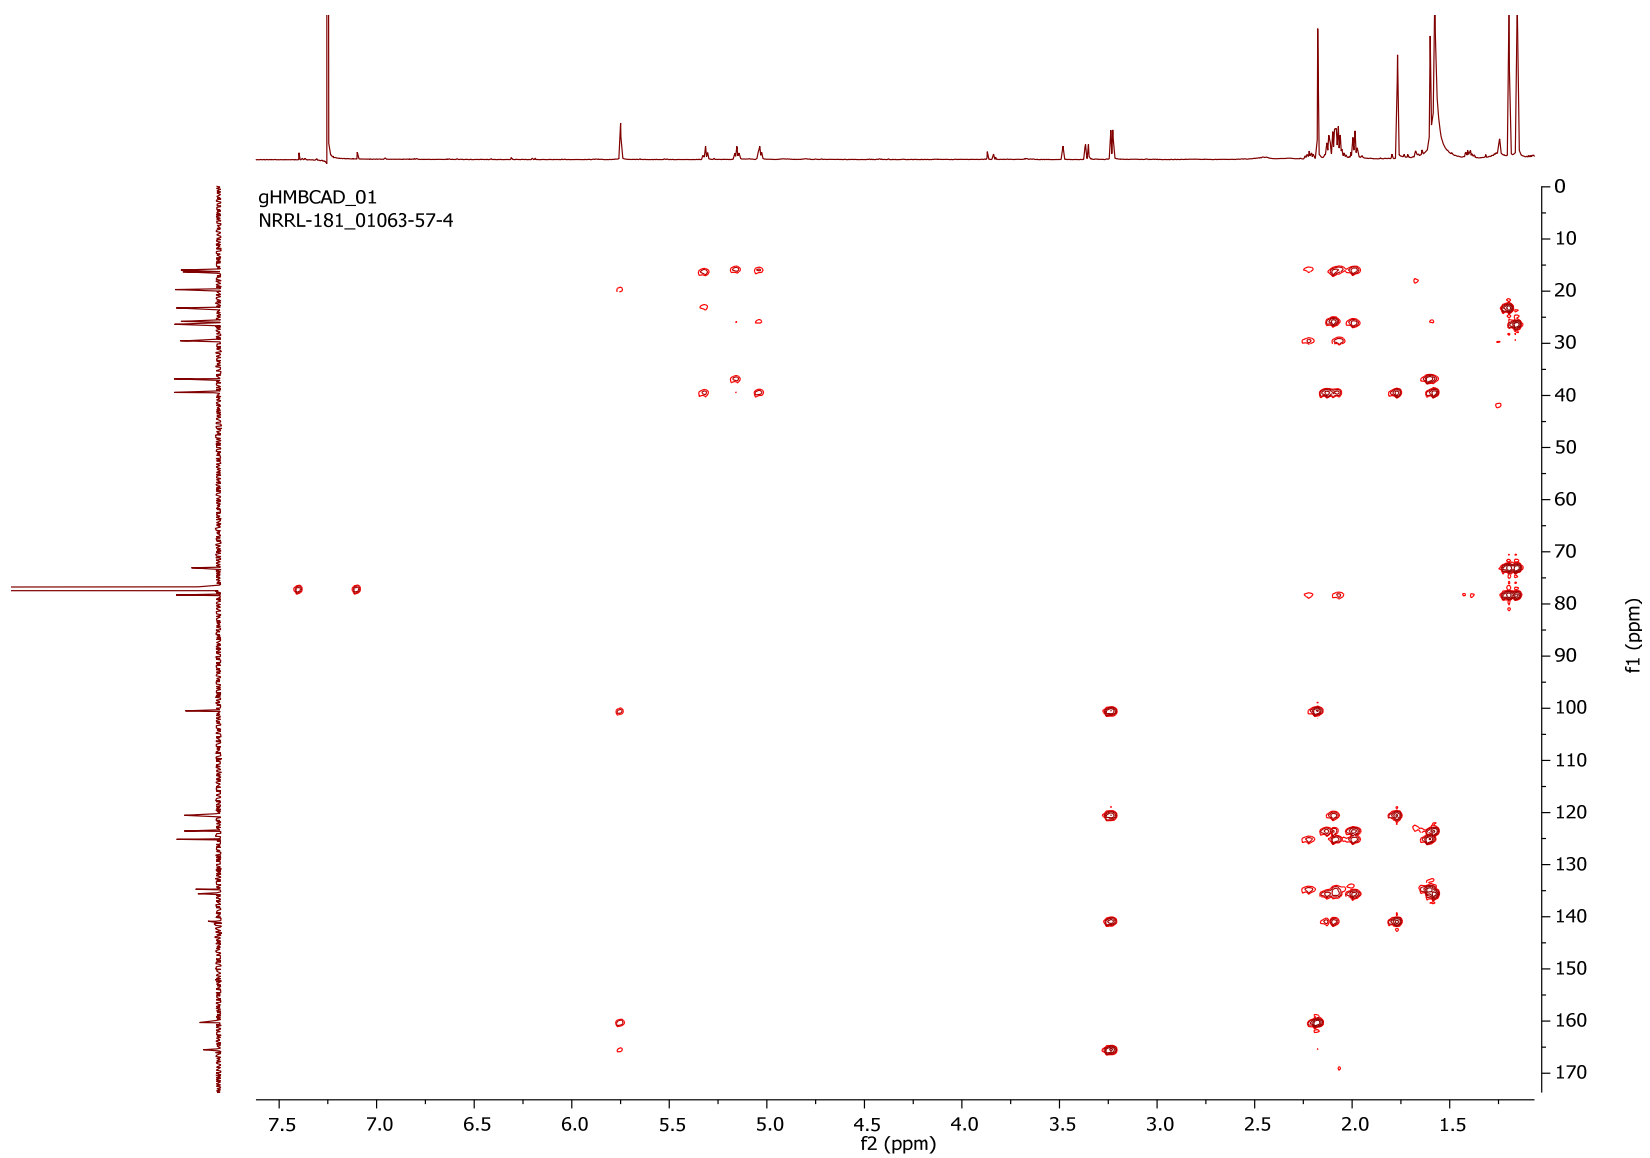

**Figure S4.** HMBC spectrum of ent-sartorypyrone E (**1**), CDCl<sub>3</sub>, 700 MHz

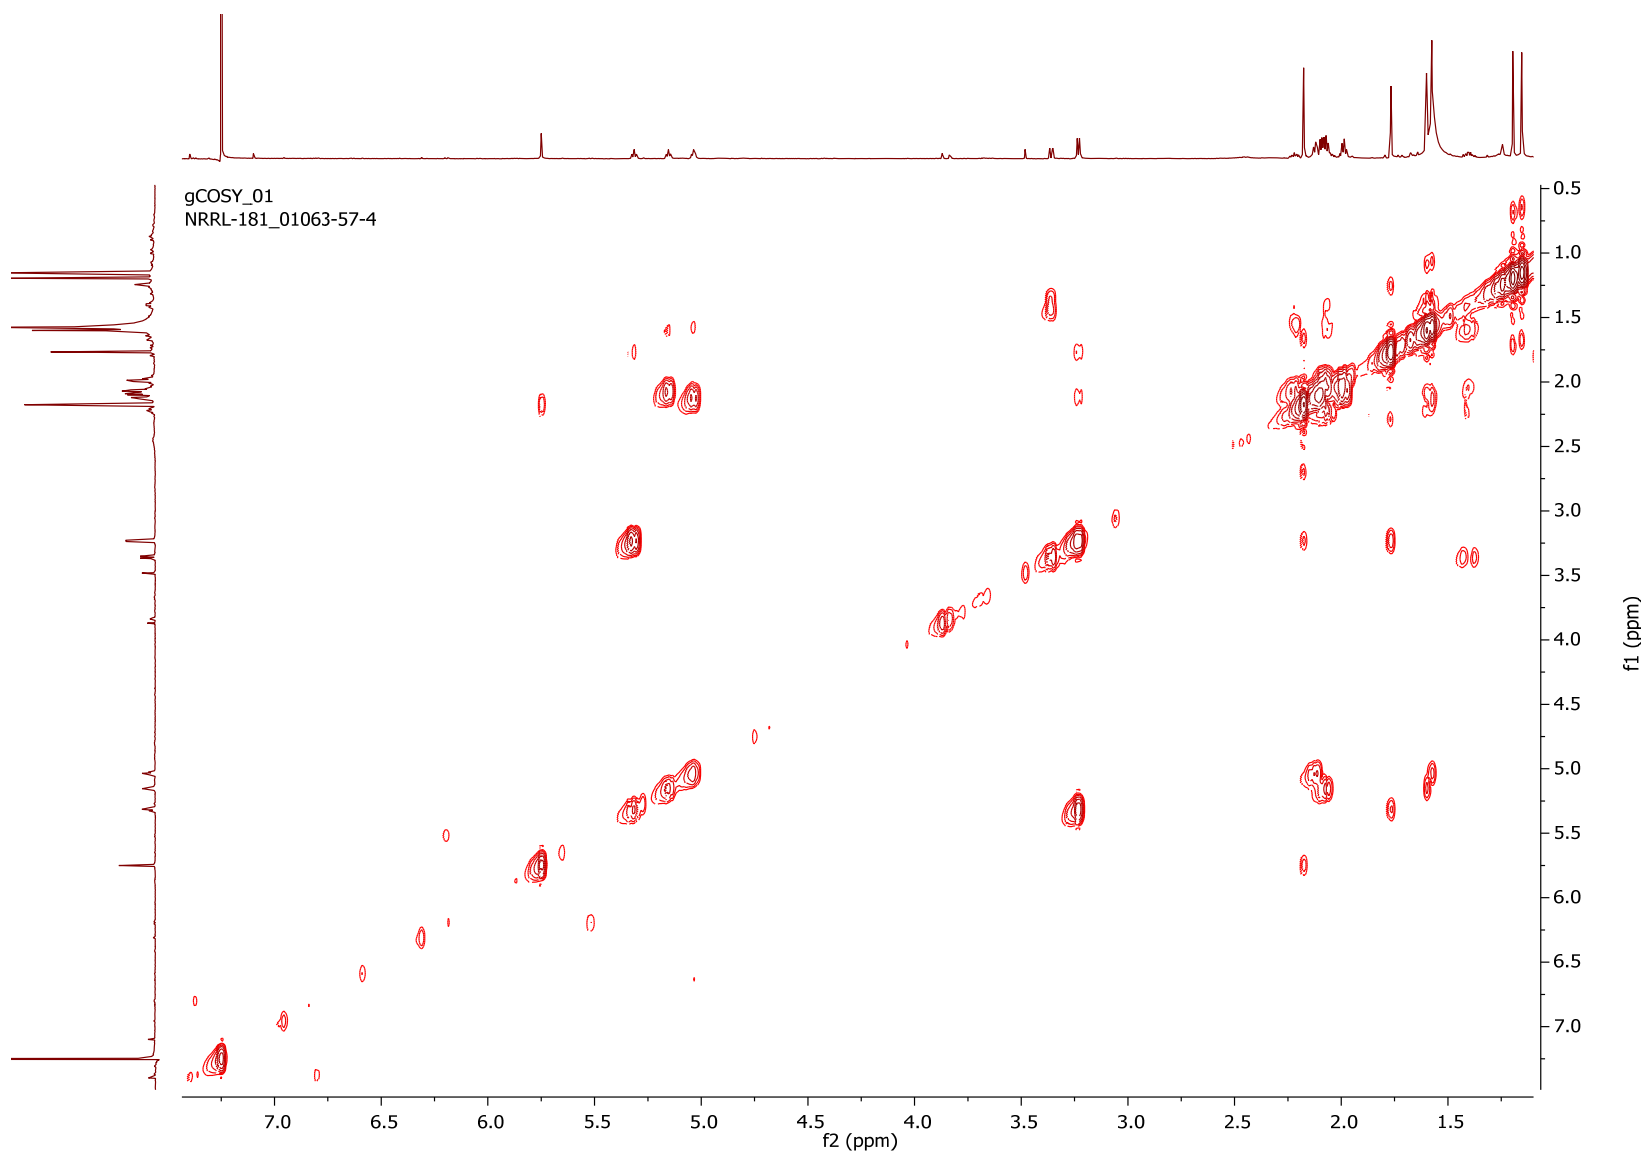

**Figure S5.**  $^1\text{H}$  COSY spectrum of ent-sartorypyrone E (**1**),  $\text{CDCl}_3$ , 700 MHz

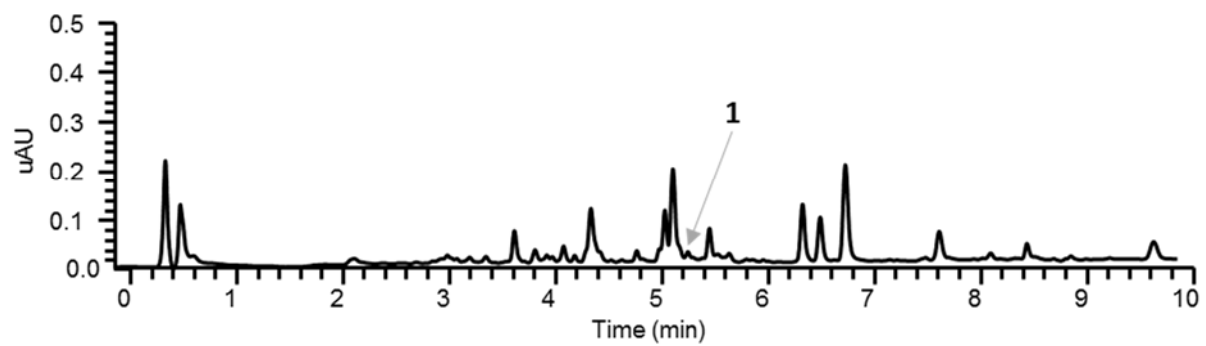

**Figure S6.** UPLC-PDA detector chromatogram of an extract of *A. fischeri* grown on solid oatmeal media



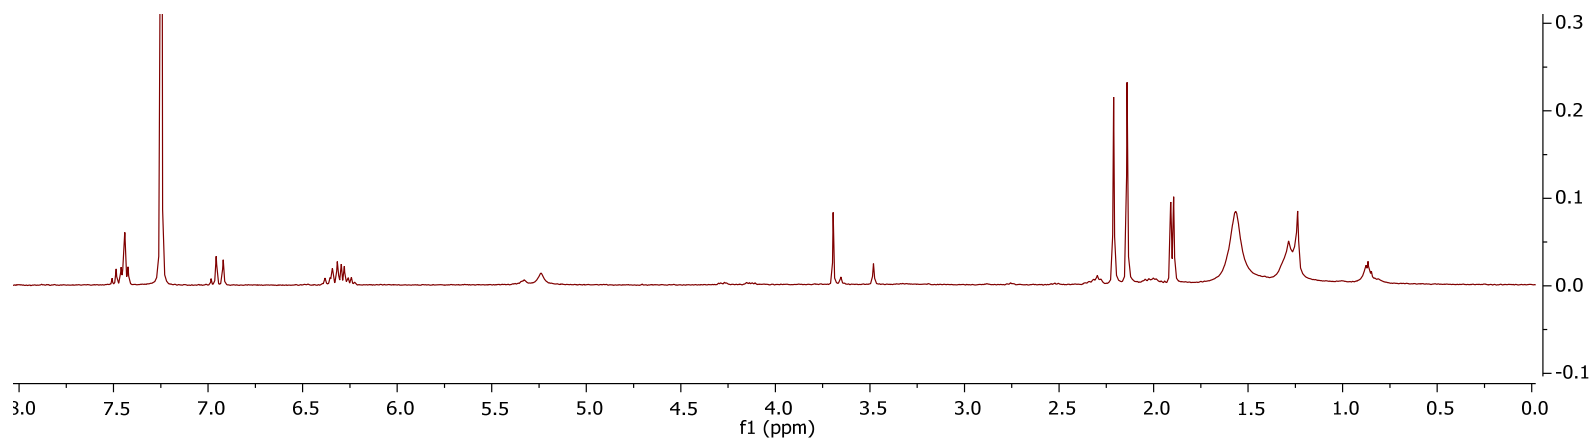

**Figure S7.** <sup>1</sup>H NMR spectrum (400 MHz) in CDCl<sub>3</sub>, of sorbicillin (**3**)

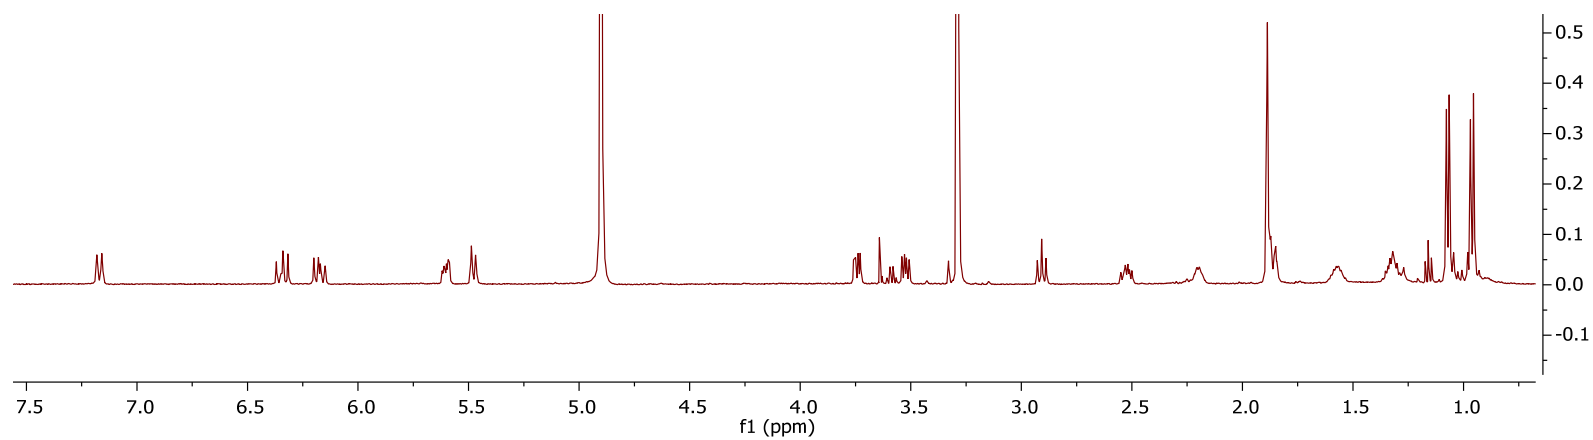

**Figure S8.** <sup>1</sup>H NMR spectrum (500 MHz) in MeOD, of trichodermic acid A (**4**)

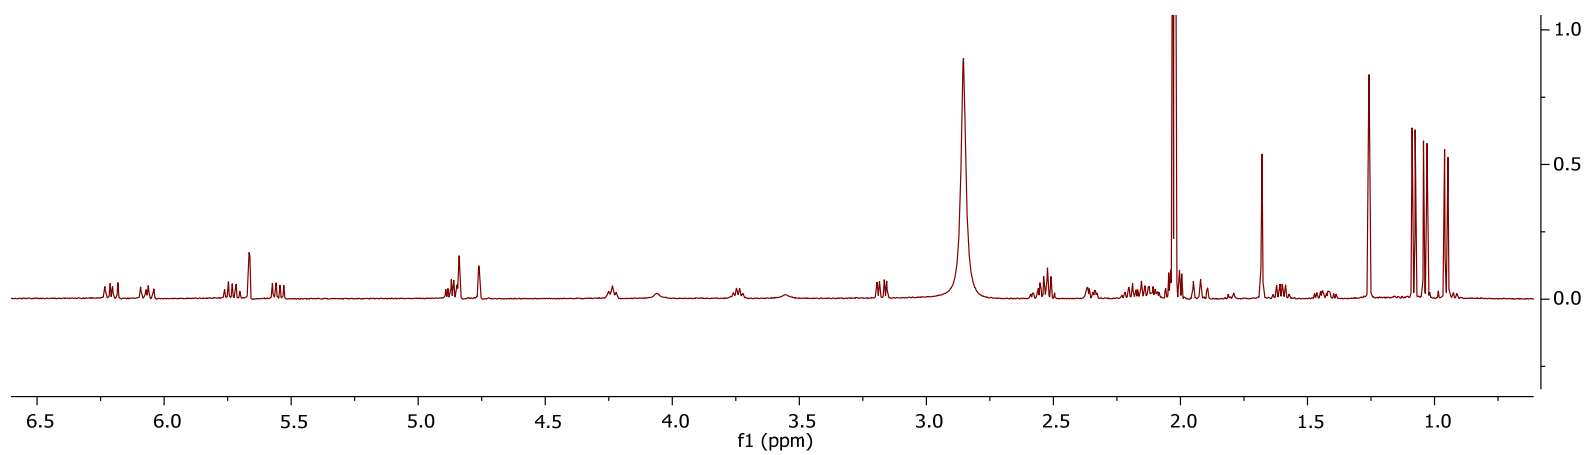

**Figure S9.**  $^1\text{H}$  NMR spectrum (500 MHz) in  $(\text{CD}_3)_2\text{CO}$ , of AA03390 (**5**)

**Figure S10.** Schematic of the Waters Synapt G2 HDMS modified to allow ozone in the trap and transfer cells to perform OzID-MS. Adapted from Vu et al.<sup>1</sup>

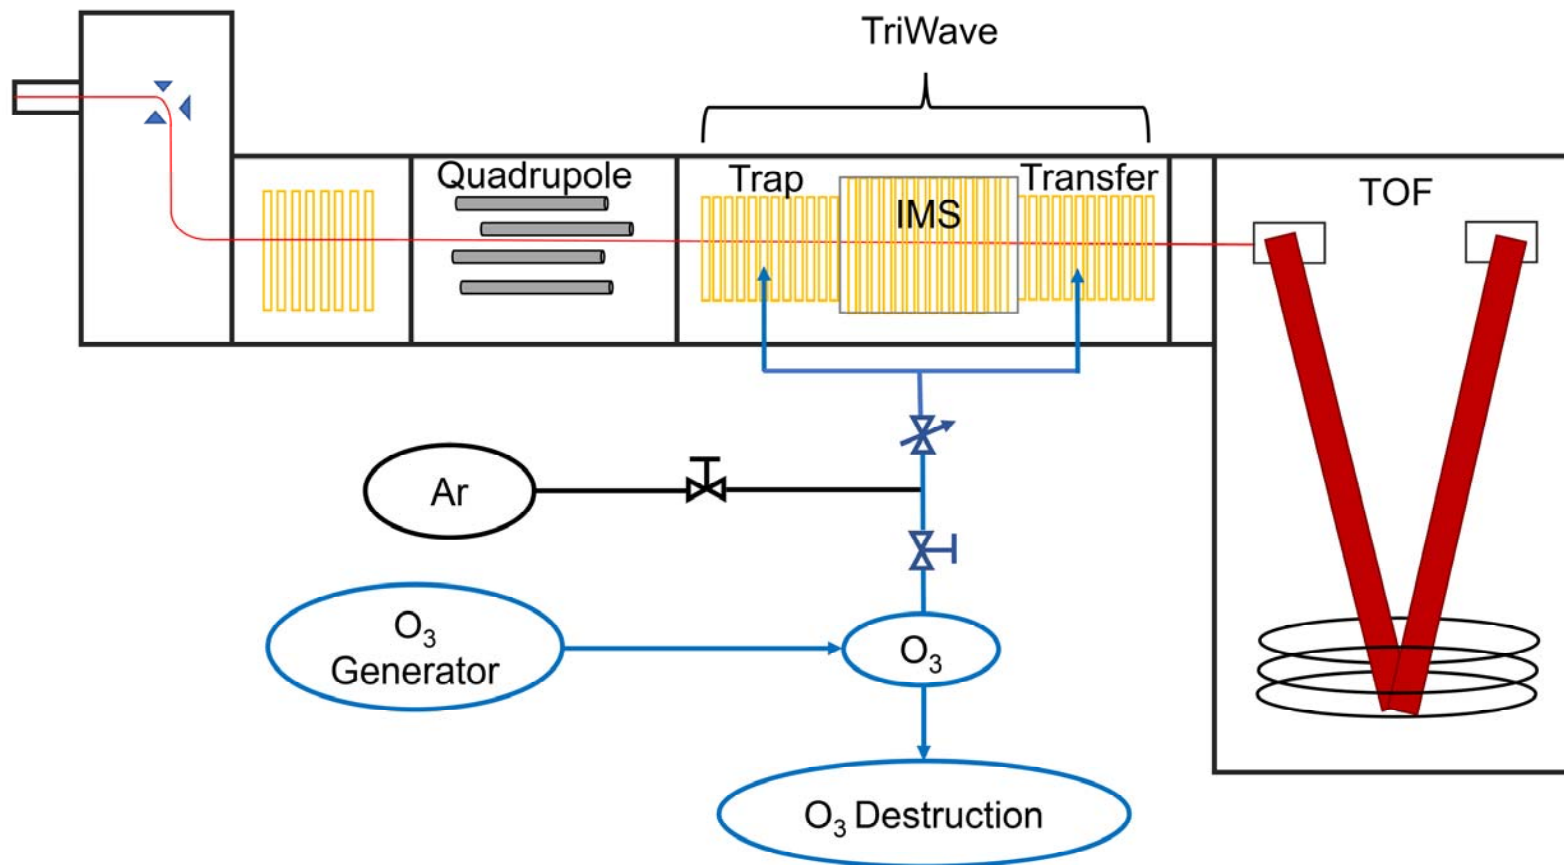

## References

- (1) Vu, N.; Brown, J.; Giles, K.; Zhang, Q., *Rapid Commun. Mass Spectrom.* **2017**, *31*, 1415-1423.
- (2) Eamvijarn, A.; Gomes, N. M.; Dethoup, T.; Buaruang, J.; Manoch, L.; Silva, A.; Pedro, M.; Marini, I.; Roussis, V.; Kijjoa, A., *Tetrahedron* **2013**, *69*, 8583-8591.
